# Supplementary material for: A Complex Regulatory Landscape Involved In The Development Of External Genitals
Source: bioRxiv or medRxiv preprint supplement (doi:10.1101/810788), 2019-10-21
Supplement: Supplementary file [file media-1.pdf]

1                   **A COMPLEX REGULATORY LANDSCAPE INVOLVED IN**  
2                   **THE DEVELOPMENT OF EXTERNAL GENITALS**

3  
4  
5  
6  
7                   **Short title: *Hox* gene regulation during the development of genitals**  
8  
9

10  
11  
12  
13                   Ana Rita Amândio<sup>1</sup>, Lucille Lopez-Delisle<sup>1</sup>, Christopher Chase Bolt<sup>1</sup>,  
14                   Bénédicte Mascrez<sup>2</sup> and Denis Duboule<sup>1,2,3,\*</sup>  
15  
16  
17  
18

19                   <sup>1</sup>School of Life Sciences, Ecole Polytechnique Fédérale de Lausanne (EPFL), 1015  
20                   Lausanne, Switzerland. <sup>2</sup>Department of Genetics and Evolution, University of Geneva, 30  
21                   quai Ernest Ansermet, 1211, Geneva, Switzerland. <sup>3</sup>Collège de France, Paris, France.  
22  
23  
24

25                   **Supplementary material**

26                   Legends to figures supplements 1 to 5

27                   Figures supplements 1 to 5

28                   Tables supplements 1 to 5  
29  
30  
31

32

### 33 LEGENDS TO FIGURES SUPPLEMENTS

34

35 **Figure supplement 1: *Hox* genes expression profile during GT development.** Bar plots  
36 show the quantification of *Hoxa*, *Hoxb* and *Hoxc* genes transcripts by RNA-seq (FPKM values)  
37 in GT cells at E12.5, E16.5 and E18.5. The gene cluster is indicated on top of each bar plot.

38

39 **Figure supplement 2: Quantification of interactions in C-DOM during GT development.**

40 **A)** Bar plots show the quantification of the ratio of the number of normalized reads (+/- 5Mb  
41 around the viewpoint) in selected regulatory regions, using mouse ES cells as a reference. The  
42 regulatory element analyzed is indicated on top of each plot. **B)** 4C-seq profiles at the *HoxD*  
43 cluster and C-DOM, using GT cells at E12.5, E13.5, E15.5, E17.5 and forebrain cells.  
44 Coordinates (mm10): chr2:73815520-74792376. The GT2 (upper panel, blue line) and island  
45 V (lower panel, red line) were used as viewpoints.

46

47 **Figure supplement 3: Interaction landscape in the *Del(GT2)* allele.** **A)** ATAC-seq profiles  
48 of *HoxD* and C-DOM in wildtype and mutant *Del(GT2)* E13.5 GTs. Coordinates (mm10):  
49 chr2:73815520-74792376. The wildtype track is the average of three biological replicates and  
50 the *Del(GT2)* track the average of two biological replicates. Peaks called using MACS2 are  
51 displayed below, for each individual replicate (vertical black lines below). The red arrows  
52 delineate the deleted region and black arrows indicate a peak lost in *Del(GT2)*. **B)** Overlay of  
53 4C-seq profiles of E13.5 GT cells using *Hoxd13* as viewpoint, wildtype in blue and *Del(GT2)*  
54 in red (average of two biological replicates). Coordinates (mm10): chr2:73815520-74792376.  
55 Viewpoint is highlighted by a gray line. The red arrow indicates the deleted region. **C)** ATAC-  
56 seq profile of E10.5 CR (average of two biological replicates). The black arrow points to the  
57 GT2 enhancer. Coordinates (mm10): chr2: 73815520-74792376. **D)** RT-qPCR of wildtype and  
58 mutant *Del(GT2)* E10.5 CR. *Hoxd13* mRNA levels were analyzed and the values plotted  
59 indicate the ratio of expression using wildtype as a reference (blue dots) (n=6 biologically  
60 independent WT or mutant GTs). A Welch's *t*-test was used to evaluate the statistical  
61 significance of changes in gene expression. Bars indicate mean with SD, \* p=0.0125. We  
62 observed a 27% decrease in the mRNA levels of *Hoxd13*.

63

64 **Figure supplement 4: Chromatin accessibility in the mutant *Del(V)* and *Inv(V)* alleles. A)**  
65 ATAC-seq profiles of wildtype and mutant *Del(V)* and *Inv(V)* E13.5 GTs. Coordinates (mm10):  
66 chr2:73815520-74792376. The wildtype track is the average of three biological replicates and  
67 the *Del(V)* and *Inv(V)* tracks are the average of two biological replicates. Peaks called using  
68 MACS2 are displayed below for each individual replicate (vertical black lines below). The red  
69 arrows highlight the deleted or inverted region and the black arrow points to the loss of a peak  
70 in the *Inv(V)* allele. **B)** Graphical representation of the percentage of interactions centromeric  
71 (red) or telomeric (blue) to island V, for each biological replicate. Coordinates (mm10):  
72 centromeric: chr2:74015789-74276083; telomeric: chr2:74332870-74671433.

73

74 **Figure supplement 5: Alleles generated by CRISPR-Cas9.** Sanger sequencing results of F0  
75 animals for all alleles generated. Scissors indicate CRISPR-Cas9 mediated breakpoints  
76 flanking each regulatory region. SgRNA sequences are marked in red or in green. PCR based  
77 genotyping was carried out with primers designed on both sides of sgRNAs targets, deletions  
78 were screened with primers F1/R2, inversions with primers F1/F2 and R2/R1, and WT were  
79 amplified with primers F1/R1 and F2/R2. See Table 1 for all primer sequences and related PCR  
80 product sizes.

Amândio et al.  
Supplementary Figure 1

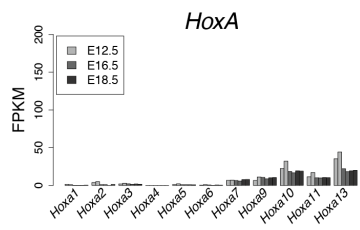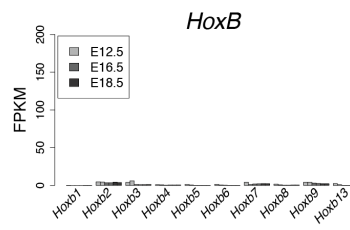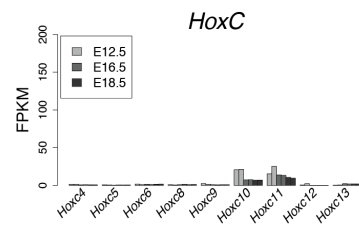

Amândio *et al.*  
Supplementary Figure 2

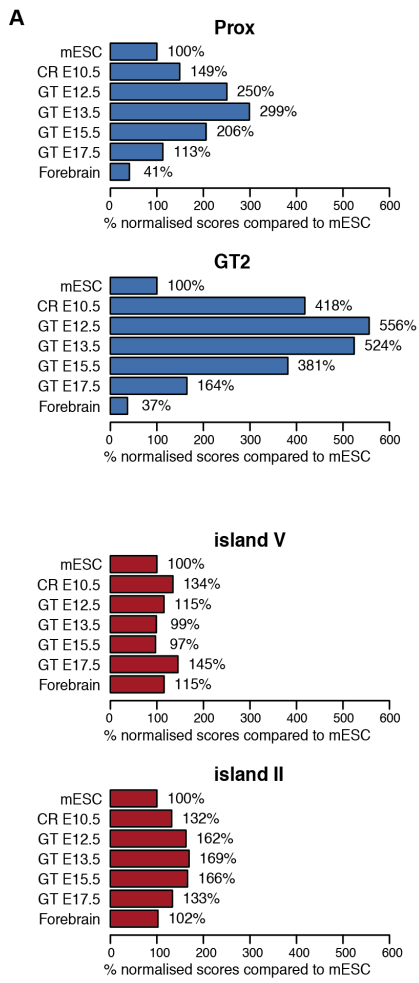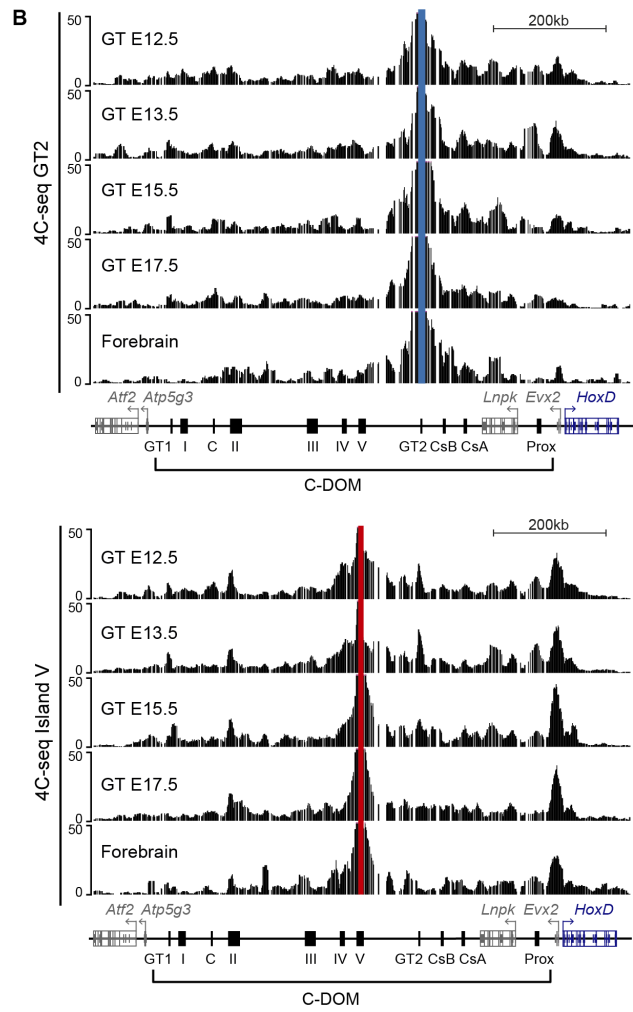

Amândio et al.  
Supplementary Figure 3

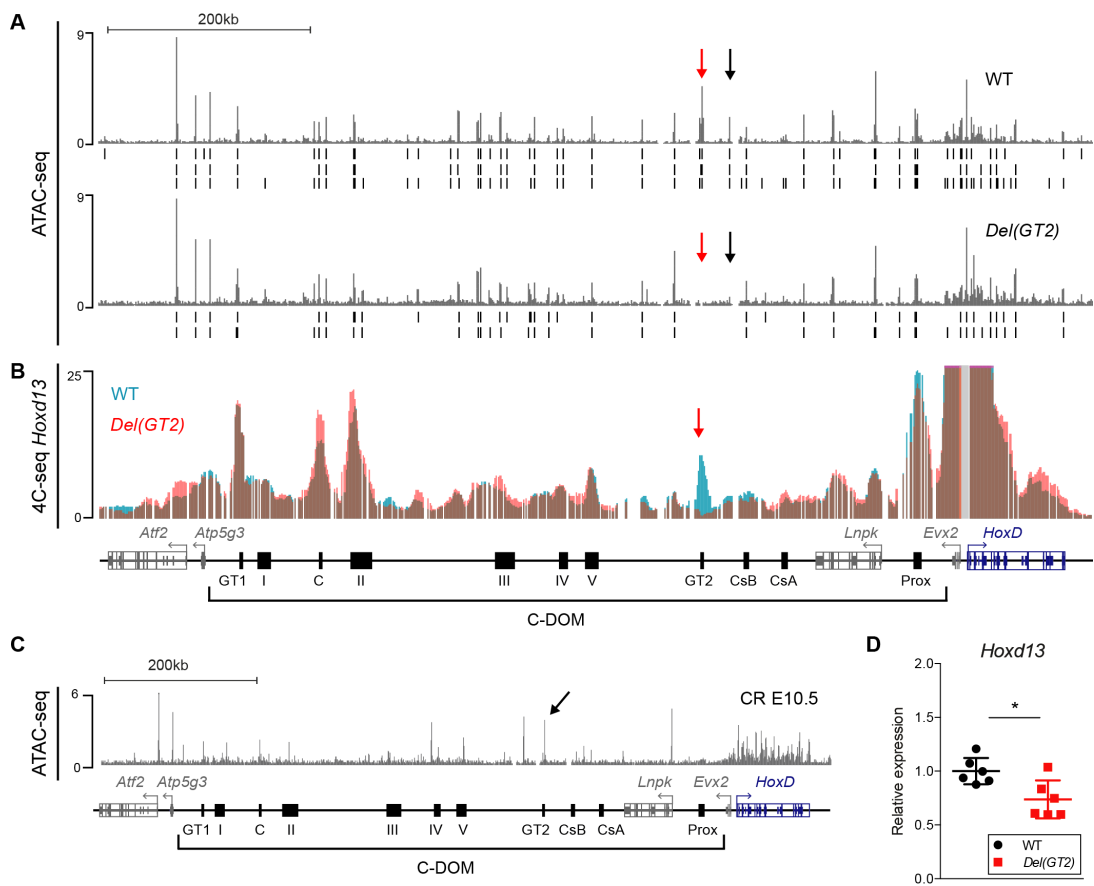

Amândio et al.  
Supplementary Figure 4

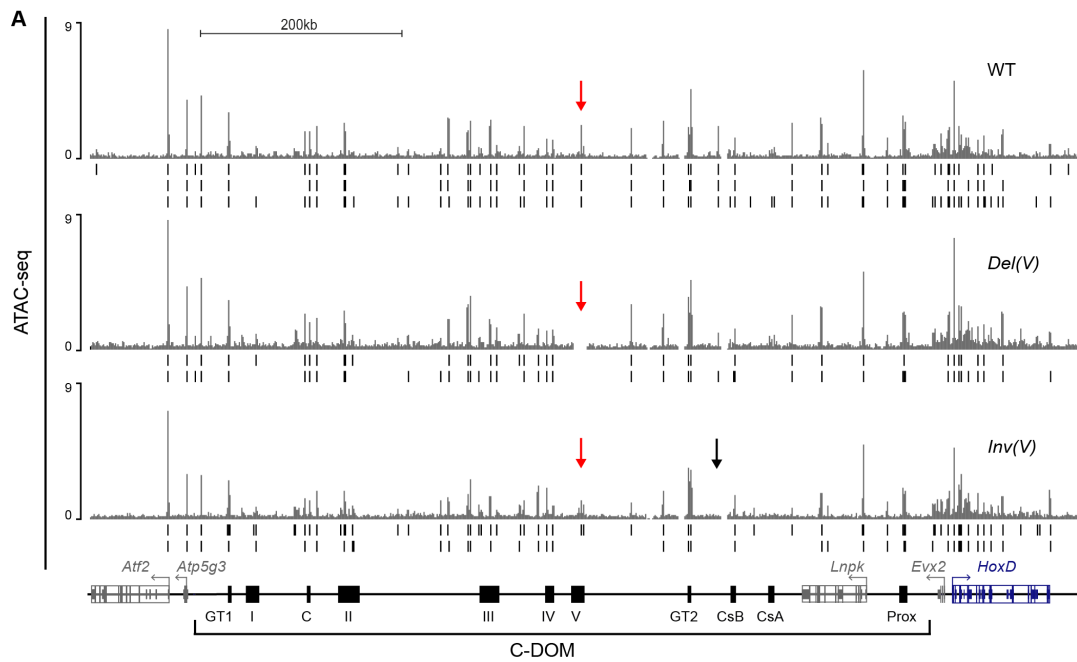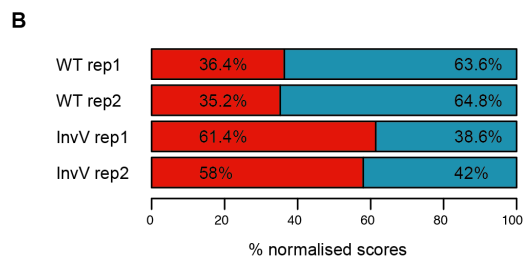

Amândio et al.  
Supplementary Figure 5

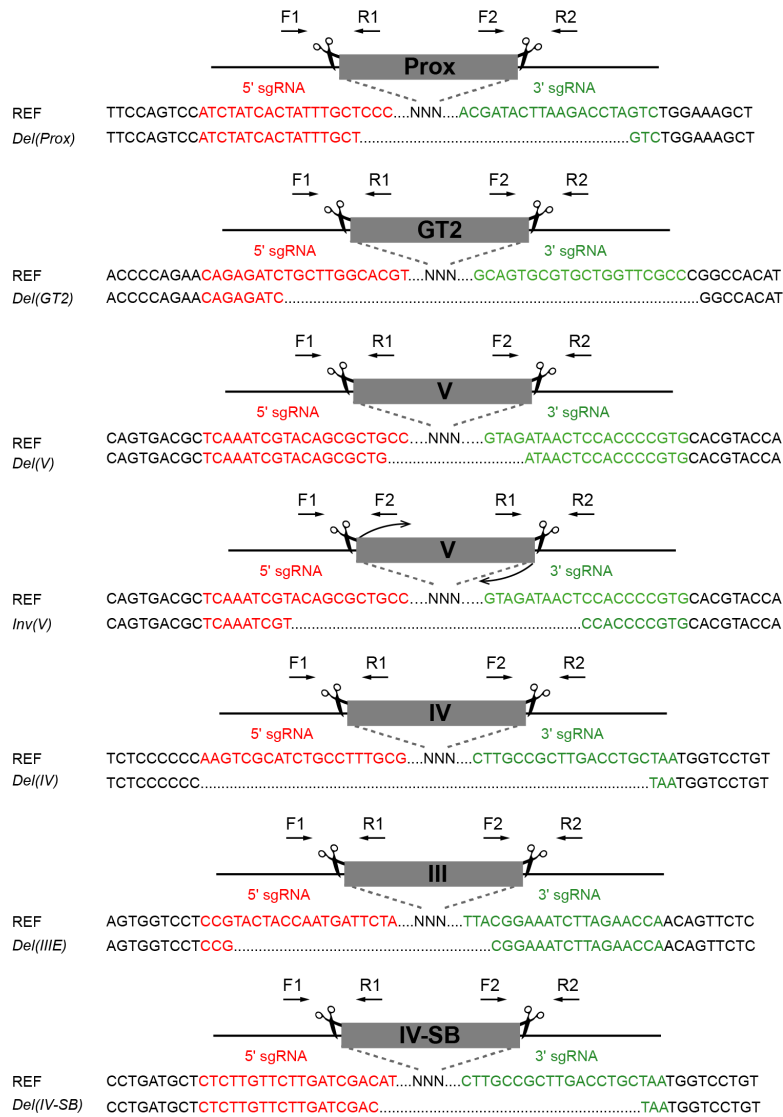



Table 1: List of genotyping primers

| Allele                       | Primer name | Sequence                     | Product Size (bp)                                                                    |
|------------------------------|-------------|------------------------------|--------------------------------------------------------------------------------------|
| <i>Del(Prox)</i>             | 590         | GACTGTGTTTTGAGGAGGACAGTG     | PCR 590-591: WT: 488bp PCR<br>594-597: Del:369bp                                     |
|                              | 591         | CTGTGGCAGTAAGAGTGTGCTGAG     |                                                                                      |
|                              | 594         | CCCAGCTGCAGCAGAAGACC         |                                                                                      |
|                              | 597         | GTTTCAAAGGCAAGTCCATGACTCTCTG |                                                                                      |
| <i>Del(GT2)</i>              | 435         | TGGGTACAGTTTGGCTCCAT         | PCR 435-436: WT: 575bp PCR<br>433-436: Del: 500bp                                    |
|                              | 436         | GCCCTTGGTGGCATGTTTAG         |                                                                                      |
|                              | 433         | CTGCCACCTACCTTCTCCTC         |                                                                                      |
| <i>Del(V) and<br/>Inv(V)</i> | RA7         | GCTTGTGTCTTGCTGTGTCA         | PCR RA7-RA8: WT: 419bp PCR<br>RA7-RA10: Del:440bp PCR RA7-<br>RA9: Inv: approx 300bp |
|                              | RA8         | AAGGAAAGTGTGTGTGCTGG         |                                                                                      |
|                              | RA9         | CCGAATCCCTAGCTGTGCGAG        |                                                                                      |
|                              | RA10        | CATCTGTAGGTTCTGTGCTTATG      |                                                                                      |
| <i>Del(IV)</i>               | 502         | CAGTTCTTTCCACGGTGAGGAAGC     | PCR 502-503: WT: 504bp PCR<br>501-507: Del: approx 450bp                             |
|                              | 503         | CACAAAGATGTGTCAAAGTTGGGGCTG  |                                                                                      |
|                              | 501         | CCTCTTGAACCACGTGCATCGC       |                                                                                      |
|                              | 507         | GCCAGCAGGAATAGCTATACTAACAGG  |                                                                                      |
| <i>Del(III)</i>              | 545         | GGAGAGCTCTGGGTGTGATTGC       | PCR 545-542: Wt: 397bp PCR<br>537-544: Del: 600bp                                    |
|                              | 542         | TGGGAAGTGTGGAGTCTTCTGCC      |                                                                                      |
|                              | 537         | CCCTTCCCCCTATCACTGTATCTCC    |                                                                                      |
|                              | 544         | CAGACCTTTCAGTAGGGTCATGG      |                                                                                      |
| <i>Del(IV-SB)</i>            | RA21        | TCTGCCTCCGTTCTCACAAT         | PCR RA21-RA22: Wt: 480bp<br>PCR RA21-RA24: Del:300bp                                 |
|                              | RA22        | GGACCATCAAGAAGCATCCG         |                                                                                      |
|                              | RA24        | GCACTAATCCAAAGCCAGCA         |                                                                                      |

Table 2: List of sgRNAs

| <b>Allele</b>        | <b>5' sgRNA sequence</b> | <b>3' sgRNA sequence</b> |
|----------------------|--------------------------|--------------------------|
| <i>Del(Prox)</i>     | ATCTATCACTATTTGCTCCC     | ACGATACTTAAGACCTAGTC     |
| <i>Del(GT2)</i>      | CAGAGATCTGCTTGGCACGT     | GCAGTGCGTGCTGGTTCGCC     |
| <i>Del(V)/Inv(V)</i> | TCAAATCGTACAGCGCTGCC     | CACGGGGTGGAGTTATCTAC     |
| <i>Del(IV)</i>       | CGCAAAGGCAGATGCGACTT     | CTTGCCGCTTGACCTGCTAA     |
| <i>Del(III)</i>      | TAGAATCATTGGTAGTACGG     | TGGTTCTAAGATTTCCGTAA     |
| <i>Del(IV-SB)</i>    | CTCTTGTTCTTGATCGACAT     | CTTGCCGCTTGACCTGCTAA     |

Table 3: List of fosmids

| <b>Clone Name</b>               | <b>Coordinates</b>     | <b>Length</b> |
|---------------------------------|------------------------|---------------|
| WI1-1879J12 (island IV)         | chr2:74235922-74281101 | 45180 bps     |
| WI1-2556D5 (island III)         | chr2:74180517-74223072 | 42556 bps     |
| WI1-1741G6 (island V)           | chr2:74270669-74309212 | 38544 bps     |
| WI1-1129A16 (between is-III/SB) | chr2:74141402-74180933 | 39532 bps     |
| WI1-109B16 (between is-V/GT2)   | chr2:74346499-74384278 | 37780 bps     |

Table 4: List of primers used for recombineering

| Primer name                         | Sequence 5' > 3'                                                                                                        |
|-------------------------------------|-------------------------------------------------------------------------------------------------------------------------|
| WI1-2556D5 (island III) Fw          | CAGTTCTCAGTCTTCAACTTGCTGAGTCAAAAATCTGTTGTTCTGTATTGCTCGAGGTCGACGGT<br>ATCG                                               |
| WI1-2556D5 (island III) Rev         | CTTTTCTGTGCTATTCTGAGGAGTGTTGGTGTGTTACTTCTGGGAAGTGATCTATGTCGGGTGCGG<br><u>AGAAAGAGGTAATGAAATGG</u> CGTCCGCCATCTCCAGCAGC  |
| WI1-1879J12 (island IV) Fw          | <u>AATAAATGAACAGCGCTGCTCAGCTGCCCTTCCCCCGTGGCTAGGCATT</u><br>GCTCGAGGTCGACGGTATCG                                        |
| WI1-1879J12 (island IV) Rev         | TCTTAACAGAGTAGCTTCCTATGTGGAATGTCTGTGGTGGAAAGCGAGGAATCTATGTCGGGTGCG<br><u>GAGAAAGAGGTAATGAAATGG</u> CGTCCGCCATCTCCAGCAGC |
| WI1-1741G6 (island V) Fw            | ACTGTTCCCTAATTAATACTAAGCCATATGCAAAAACATTCTTGAATACCATCTATGTCGGGTGCG<br><u>GAGAAAGAGGTAATGAAATGG</u> GCTCGAGGTCGACGGTATCG |
| WI1-1741G6 (island V) Rev           | TCTTAACAGAGTAGCTTCCTATGTGGAATGTCTGTGGTGGAAAGCGAGGA<br>CGTCCGCCATCTCCAGCAGC                                              |
| WI1-1129A16 (between is-III/SB) Fw  | TTTTGATCCTGAGGCAGCGGAAGACTGTGCCACACTAGATGTAAGTCTGAG<br>GCTCGAGGTCGACGGTATCG                                             |
| WI1-1129A16 (between is-III/SB) Rev | TGATTCTTACCAGACTCTAGTTGTCTGCATCCCAAGTCCCTACTAGGAC<br><u>ATCTATGTCGGGTGCGGAGAAAGAGGTAATGAAATGG</u> CGTCCGCCATCTCCAGCAGC  |
| WI1-109B16 (between is-V/GT2) Fw    | CACCCAGTTTTTTTAATCCTGCCGATCTTTGCATTGACGGTGGCTGTAAGCTCGAGGTCGACGGT<br>ATCG                                               |
| WI1-109B16 (between is-V/GT2) Rev   | CAAGCATCTCCTCTTTGGTGTCTCAGAAGCAGTTGGCTAAATGAGCTCCTATCTATGTCGGGTGCG<br><u>GAGAAAGAGGTAATGAAATGG</u> CGTCCGCCATCTCCAGCAGC |

**Homology Arm** - restriction site (PISceI) - Primer

Table 5: List of 4C-seq primers

| Viewpoint     |    | Sequence (5' > 3')                                                                     |
|---------------|----|----------------------------------------------------------------------------------------|
| <i>Hoxd13</i> | iF | AATGATACGGCGACCACCGAACACTCTTCCCTACACGACGCTCTTCCGATCT<br>XXXXAAAATCCTAGACCTGGTCATG      |
|               | iR | CAAGCAGAAGACGGCATAACGAGGCCGATGGTGCTGTATAGG                                             |
| GT2           | iF | AATGATACGGCGACCACCGAACACTCTTCCCTACACGACGCTCTTCCGATCT<br>XXXXTTCTCTCTTTTAGTGACCTTGGAACA |
|               | iR | CAAGCAGAAGACGGCATAACGAAGAAATATCCAAAGGTAAAAATCAAGAA                                     |
| island V      | iF | AATGATACGGCGACCACCGAACACTCTTCCCTACACGACGCTCTTCCGATCT<br>XXXXGCTACAAGACTCATTCGTTAA      |
|               | iR | CAAGCAGAAGACGGCATAACGAACTAACTTAAGTCCCCTCG                                              |
| island IV     | iF | AATGATACGGCGACCACCGAACACTCTTCCCTACACGACGCTCTTCCGATCT<br>XXXXTACAGCCTAGTCTTTTCTCATCAT   |
|               | iR | CAAGCAGAAGACGGCATAACGATGTAATTATTCAGGGTTGGAGTAGAATCA                                    |

XXXX – Corresponds to possible barcode sequences
